# Supplementary material for: Green and White Asparagus (Asparagus officinalis): A Source of Developmental, Chemical and Urinary Intrigue
Source: PubMed Central journal article supplement (PMC7022954; doi:10.3390/metabo10010017), 2019-12-25
Supplement: metabolites-10-00017-s001.pdf [file metabolites-10-00017-s001.pdf]

Supplementary Material

# Green and white asparagus (*Asparagus officinalis*): A Source of Developmental, Chemical and Urinary Intrigue

Eirini Pegiou <sup>1</sup>, Roland Mumm <sup>2</sup>, Parag Acharya <sup>3</sup>, Ric C.H. de Vos <sup>2</sup>, Robert D. Hall <sup>1,2,4,\*</sup>

<sup>1</sup> Wageningen University & Research, Laboratory of Plant Physiology, P.O. Box 16, 6700AA Wageningen, The Netherlands; eirini.pegiou@wur.nl

<sup>2</sup> Wageningen University & Research, Business Unit Bioscience, P.O. Box 16, 6700AA Wageningen, The Netherlands; roland.mumm@wur.nl (R.M.); ric.devos@wur.nl (R.C.H.d.V.)

<sup>3</sup> Unilever Foods Innovation Centre, Bronland 14, 6708WH Wageningen, The Netherlands; parag.acharya@unilever.com

<sup>4</sup> Netherlands metabolomics Centre, Einsteinweg 55, 2333CC Leiden, The Netherlands

\* Correspondence: robert.hall@wur.nl

## Supplementary Tables

**Table S1:** List of non-volatile secondary metabolites detected and reported in *A. officinalis* (green and/or white) materials (when not indicated, this was not reported in the article and green can be assumed). For the description of the analytical techniques the following codes apply; the separation or ionization technique (HPLC: high performance liquid chromatography, MALDI: matrix assisted laser desorption/ionization) and the detector (MS: mass spectrometry, UV: ultraviolet, NMR: nuclear magnetic resonance, I: imaging) (MW: molecular weight in g/mol, FW: fresh weight, DW: dry weight).

| <i>Detected secondary metabolite,<br/>Molecular formula (MW)</i>     | <i>Asparagus material (reported<br/>concentration)</i>                                                          | <i>Analytical<br/>technique<br/>(Reference)</i> |
|----------------------------------------------------------------------|-----------------------------------------------------------------------------------------------------------------|-------------------------------------------------|
| Polyphenols                                                          |                                                                                                                 |                                                 |
| <i>Flavonoids</i>                                                    |                                                                                                                 |                                                 |
| quercetin-3-O-rutinoside<br>(rutin),<br>$C_{27}H_{30}O_{16}$ (610.5) | Green spears (2.28 mg/100 g FW and<br>0.05 % FW in top section) [1]                                             | HPLC-MS [1–4]                                   |
|                                                                      | Green spears (ca. 7 mg/g DW in top<br>section, 5 mg/g DW in middle<br>section, 2 mg/g DW in bottom<br>sections) | HPLC-UV at<br>210 nm [5]                        |
|                                                                      | White spears (<0.5 mg/g DW)                                                                                     | HPLC-UV at<br>210 nm [5]                        |
|                                                                      | White spears (1.1 mg/100 g FW) &<br>green spears (48.2 mg/100 g FW)                                             | HPLC-MS [6]                                     |
|                                                                      | Cooked white spears                                                                                             | HPLC-MS [7]                                     |

|                                                                                                                           |                                 |                                             |
|---------------------------------------------------------------------------------------------------------------------------|---------------------------------|---------------------------------------------|
|                                                                                                                           | Asparagus waste                 | HPLC-UV & MS [8]                            |
|                                                                                                                           | Green spears                    | HPLC-MS [9] and HPLC-MS/MS & MALDI-IMS [10] |
| apigenin-6-8-di-C-glucoside (vicenin 2),<br><i>C</i> <sub>27</sub> <i>H</i> <sub>30</sub> <i>O</i> <sub>15</sub> (549.5)  | Green spears                    | HPLC-MS [9]                                 |
| apigenin rhamnoside,<br><i>C</i> <sub>21</sub> <i>H</i> <sub>20</sub> <i>O</i> <sub>9</sub> (416.4)                       |                                 | HPLC-MS [3]                                 |
| quercetin-3-O-glucosyl-rutinoside,<br><i>C</i> <sub>33</sub> <i>H</i> <sub>40</sub> <i>O</i> <sub>21</sub> (772.7)        |                                 | HPLC-MS [9]                                 |
| quercetin-3-β-D glucoside,<br><i>C</i> <sub>21</sub> <i>H</i> <sub>19</sub> <i>O</i> <sub>12</sub> (463.4)                |                                 | HPLC-MS [3,9]                               |
| quercetin diglucoside,<br><i>C</i> <sub>27</sub> <i>H</i> <sub>30</sub> <i>O</i> <sub>17</sub> (626.5)                    |                                 | HPLC-MS [9]                                 |
| quercetin triglycoside,<br><i>C</i> <sub>33</sub> <i>H</i> <sub>40</sub> <i>O</i> <sub>22</sub> (788.7)                   |                                 | HPLC-MS [4]                                 |
| quercetin galactoside,<br><i>C</i> <sub>21</sub> <i>H</i> <sub>20</sub> <i>O</i> <sub>12</sub> (464.38)                   |                                 | HPLC-MS [3]                                 |
| isorhamnetin-3-O-rutinoside,<br><i>C</i> <sub>28</sub> <i>H</i> <sub>32</sub> <i>O</i> <sub>16</sub> (624.5)              |                                 | HPLC-MS [3]                                 |
| isorhamnetin-3-O-rutinoside (narcissin),<br><i>C</i> <sub>28</sub> <i>H</i> <sub>32</sub> <i>O</i> <sub>16</sub> (624.5)  |                                 | HPLC-MS [4,9]                               |
| noricaritin-O-glucoside (amurensin),<br><i>C</i> <sub>26</sub> <i>H</i> <sub>30</sub> <i>O</i> <sub>12</sub> (534.5)      |                                 | HPLC-MS [9]                                 |
| kaempferol-3-O-rutinoside (nicotiflorin),<br><i>C</i> <sub>27</sub> <i>H</i> <sub>30</sub> <i>O</i> <sub>15</sub> (594.5) |                                 | HPLC-MS [4,9]                               |
| kaempferol glucoside,<br><i>C</i> <sub>21</sub> <i>H</i> <sub>20</sub> <i>O</i> <sub>11</sub> (448.4)                     | Green spears<br>Asparagus waste | HPLC-MS [3,9]<br>HPLC-UV & MS [8]           |
| kaempferol-O-acetylglucoside,<br><i>C</i> <sub>23</sub> <i>H</i> <sub>22</sub> <i>O</i> <sub>12</sub> (490.4)             | Green spears                    | HPLC-MS [9]                                 |
| kaempferol-3-p-coumaroyl-glucoside,                                                                                       |                                 |                                             |

|                                                                    |                                                                                                            |                                            |
|--------------------------------------------------------------------|------------------------------------------------------------------------------------------------------------|--------------------------------------------|
| $C_{30}H_{26}O_{13}$ (594.52)                                      |                                                                                                            |                                            |
| quercetin,                                                         | Green spears (0.14 mg/100 g FW)                                                                            | HPLC-MS [2,9]                              |
| $C_{15}H_{10}O_7$ (302.24)                                         | Asparagus waste                                                                                            | HPLC-UV & MS [8]                           |
| <i>Phenolic acids</i>                                              |                                                                                                            |                                            |
| ferulic acid,                                                      | Green spears (1.05 mg/100 g FW)                                                                            | HPLC-MS [2,3,9]                            |
| $C_{10}H_{10}O_4$ (194.18)                                         | Asparagus waste                                                                                            | HPLC-UV & MS [8]                           |
|                                                                    | Cooked white spears                                                                                        | HPLC-MS [7]                                |
| vanillic acid,                                                     | Green spears                                                                                               | HPLC-MS [9]                                |
| $C_8H_8O_4$ (168.15)                                               |                                                                                                            |                                            |
| 3-caffeoylquinic acid (chlorogenic acid),                          |                                                                                                            | HPLC-MS [3,9]                              |
| $C_{16}H_{18}O_9$ (354.31)                                         |                                                                                                            |                                            |
| 3-p-coumaroylquinic acid,                                          |                                                                                                            | HPLC-MS [3,9]                              |
| $C_{16}H_{18}O_8$ (338.31)                                         |                                                                                                            |                                            |
| 5-caffeoylquinic acid (neochlorogenic acid)/1-caffeoylquinic acid, |                                                                                                            |                                            |
| $C_{16}H_{18}O_9$ (354.31)                                         |                                                                                                            |                                            |
| <i>Saponins</i>                                                    |                                                                                                            |                                            |
| protodioscin,                                                      | Asparagus seeds                                                                                            | <sup>1</sup> H- & <sup>13</sup> C-NMR [11] |
| $C_{51}H_{84}O_{22}$ (1049.2)                                      |                                                                                                            |                                            |
|                                                                    | Asparagus spears (0.24 mg/100 g FW in top section, 25mg/100 g FW in bottom section)                        | HPLC-MS [1]                                |
|                                                                    | Green spears (<1 mg/g DW)                                                                                  | HPLC-UV at 210 nm [5]                      |
|                                                                    | White spears (ca 2.6 mg/g DW in top section, 3.7 mg/g DW in middle section, 4-5 mg/g DW in bottom section) |                                            |
|                                                                    | White spears (0.66-13.6 mg/100 g) & green spears (0.3 mg/100 g)                                            | HPLC-MS/MS [12]                            |
| dioscin,                                                           | White spears (6.18-33.9 mg/100 g) & green spears (6.49 mg/100 g)                                           | HPLC-MS/MS [12]                            |
| $C_{45}H_{72}O_{16}$ (869.05)                                      |                                                                                                            |                                            |
| methyl protodioscin,                                               | Green spears (0.65 mg/100 g)                                                                               |                                            |
| $C_{52}H_{86}O_{22}$ (1063.2)                                      |                                                                                                            |                                            |
| asparasaponin (ASP) I,                                             | White spears (0.32-3.75 mg/100 g) & green spears (0.3 mg/100 g)                                            |                                            |
| $C_{51}H_{84}O_{22}$ (1049.2)                                      |                                                                                                            |                                            |

|                                                                                |                                                                                      |                                                                  |
|--------------------------------------------------------------------------------|--------------------------------------------------------------------------------------|------------------------------------------------------------------|
| asparasaponin II,<br>$C_{45}H_{74}O_{18}$ (903.1)<br>(25R/S)-dihydro-ASP-II    | White spears (0.02-0.4 mg/100 g) &<br>green spears (0.1 mg/100 g)                    |                                                                  |
| yamogenin,<br>$C_{27}H_{42}O_3$ (414.6)                                        | White spears (bottom parts)<br><br>Green spears                                      | HPLC-UV at 210<br>nm [13]<br>HPLC-MS and<br>1H & 13C NMR<br>[14] |
| sarsasapogenin,<br>$C_{27}H_{44}O_3$ (416.6)                                   | Asparagus roots                                                                      | HPLC-MS and<br>1H & 13C NMR<br>[15]                              |
| Sulphur compounds                                                              |                                                                                      |                                                                  |
| asparagusic acid,<br>$C_4H_6O_2S_2$ (150.2)                                    | White spears (10.6 mg/100 g FW) &<br>green spears (9.86 mg/100 g FW)<br>Green spears | HPLC-MS [6,9]<br><br>HPLC-MS [9]                                 |
| asparaptine,<br>$C_{10}H_{18}N_4O_3S_2$ (306.4)                                | White spears (29.8 mg/100 g FW) &<br>green spears (25.1 mg/100 g FW)<br>Green spears | HPLC-MS [6]<br><br>HPLC-MS/MS &<br>MALDI-IMS<br>[16]             |
| Other compounds                                                                |                                                                                      |                                                                  |
| (1 stilbene, 2 lignans, 36<br>oxylipins, 2 glyceroglycolipids<br>and 4 others) | Green spears                                                                         | HPLC-MS [9]                                                      |

**Table S2:** List of volatile secondary metabolites detected and reported in *A. officinalis* (green and/or white) materials (when not indicated, this was not reported in the article and green can be assumed). For the description of the analytical techniques the following codes apply; the trapping or extraction technique (SPE: liquid solid phase extraction, LLE: liquid liquid extraction, SDE: simultaneous steam distillation extraction, SPME: solid phase microextraction, TDU: thermal desorption), separation (GC: gas chromatography) and the detector (MS: mass spectrometry, O: olfactometry). (MW: molecular weight in g/mol). \*\*key odorants based on the literature reported in this review and summarized in Table 2.

| <i>Detected secondary metabolites,<br/>Molecular formula (MW)</i> | <i>Asparagus material (reported<br/>concentration in ppb)</i> | <i>Analytical<br/>technique<br/>(Reference)</i> |
|-------------------------------------------------------------------|---------------------------------------------------------------|-------------------------------------------------|
| Alcohols                                                          |                                                               |                                                 |
| n-butanol,<br>$C_4H_{10}O$ (74.12)                                | Cooked white spears (160)                                     | SPE-GC-MS [17]                                  |

---

|                                               |                              |                        |
|-----------------------------------------------|------------------------------|------------------------|
| 1-penten-3-ol,<br><i>C5H10O</i> (86.13)       | Cooked white spears (80)     |                        |
| 2-penten-1-ol,<br><i>C5H10O</i> (86.13)       | Cooked white spears (100)    |                        |
| 1-pentanol,<br><i>C5H12O</i> (88.15)          | Cooked white spears (2300)   |                        |
|                                               | Cooked white spears          | SDE-GC-MS<br>[7,18–20] |
| 2-pentanol,<br><i>C5H12O</i> (88.15)          | Cooked white spears (25)     | SPE-GC-MS [17]         |
| 2,4-hexadien-1-ol,<br><i>C6H10O</i> (98.145)  | Cooked white spears (20)     |                        |
| 2-hexen-1-ol,<br><i>C6H12O</i> (100.16)       | Cooked white spears (240)    |                        |
| 1-hexanol,<br><i>C6H14O</i> (102.162)         | Cooked white spears (8400)   |                        |
|                                               | Cooked white spears          | SDE-GC-MS<br>[7,18,19] |
| 2,4-heptadien-1-ol,<br><i>C7H12O</i> (112.17) | Cooked white spears (65)     | SPE-GC-MS [17]         |
| 2-hepten-1-ol,<br><i>C7H14O</i> (114.186)     | Cooked white spears (300)    |                        |
| 1-heptanol,<br><i>C7H16O</i> (116.88)         | Cooked white spears (25)     |                        |
| benzyl alcohol,<br><i>C7H8O</i> (108.14)      | Cooked white spears (410)    |                        |
| 2-phenylethanol,<br><i>C8H10O</i> (122.16)    | Cooked white spears (440)    |                        |
| 3-methyl-1-butanol,<br><i>C5H12O</i> (88.148) | Cooked white spears (80)     |                        |
| 1-octen-3-ol **,<br><i>C8H16O</i> (128.21)    | Green asparagus juice (42.8) | SPME-GC-MS<br>[21]     |
|                                               | Cooked white spears (300)    | SPE-GC-MS [17]         |
|                                               | Cooked white spears          | SDE-GC-MS<br>[19,20]   |
|                                               | Asparagus spears             | TDU-GC-MS<br>[22]      |
| 2-octen-1-ol,<br><i>C8H16O</i> (128.21)       | Cooked white spears (300)    | SPE-GC-MS [17]         |
| 1-octanol,<br><i>C8H18O</i> (130.23)          | Cooked white spears (70)     |                        |

---

|                                                |                               |                                            |
|------------------------------------------------|-------------------------------|--------------------------------------------|
| 2,4-nonadien-1-ol,<br><i>C9H16O</i> (140.22)   | Cooked white spears (50)      |                                            |
| 2-nonen-1-ol,<br><i>C9H18O</i> (142.24)        | Cooked white spears (20)      |                                            |
| 1-nonanol,<br><i>C9H20O</i> (144.26)           | Green asparagus juice (1)     | SPME-GC-MS<br>[21]                         |
|                                                | Cooked white spears (60)      | SPE-GC-MS [17]                             |
| 2,4-decadien-1-ol,<br><i>C10H18O</i> (154.249) | Cooked white spears (70)      |                                            |
| Aldehydes                                      |                               |                                            |
| 2-butenal,<br><i>C4H6O</i> (70.09)             | Green asparagus juice (25.5)  | SPME-GC-MS<br>[21]                         |
|                                                | Cooked white spears           | SDE-GC-MS<br>[18–20]                       |
| 3-methyl-butanal,<br><i>C5H10O</i> (86.13)     | Green asparagus juice (4.4)   | SPME-GC-MS<br>[21]                         |
| pentanal,<br><i>C5H10O</i> (86.13)             | Green asparagus juice (51.3)  | SPME-GC-MS<br>[21]                         |
|                                                | Cooked white spears           | SPE-GC-MS [17]<br>and SDE-GC-MS<br>[19,20] |
| 2-methyl-2-butenal,<br><i>C5H8O</i> (84.12)    | Green asparagus juice (31.3)  | SPME-GC-MS<br>[21]                         |
| 2-pentenal,<br><i>C5H8O</i> (84.12)            | Green asparagus juice (18.2)  |                                            |
| 2-methyl-2-pentenal,<br><i>C6H10O</i> (98.14)  | Green asparagus juice (0.8)   |                                            |
| 2-hexenal **,<br><i>C6H10O</i> (98.14)         | Green asparagus juice (13.2)  |                                            |
|                                                | Cooked white spears           | SPE-GC-MS [17]<br>and SDE-GC-MS<br>[18–20] |
|                                                | Asparagus spears              | TDU-GC-MS<br>[22]                          |
| hexanal **,<br><i>C6H12O</i> (100.16)          | Green asparagus juice (259.2) | SPME-GC-MS<br>[21]                         |
|                                                | White spears (100)            | SPE-GC-MS [17]                             |
|                                                | Cooked white spears           | SDE-GC-MS &<br>GCO [7,19,20]               |

---

|                                                |                              |                                              |
|------------------------------------------------|------------------------------|----------------------------------------------|
|                                                | Asparagus spears             | TDU-GC-MS<br>[22]                            |
| 2,4-heptadienal,<br><i>C7H10O</i> (110.15)     | Green asparagus juice (2)    | SPME-GC-MS<br>[21]                           |
| 2-heptenal,<br><i>C7H12O</i> (112.17)          | Green asparagus juice (52.7) |                                              |
|                                                | White spears (30)            | SPE-GC-MS [17]                               |
|                                                | Cooked white spears          | SDE-GC-MS<br>[7,19,20]                       |
| heptanal,<br><i>C7H14O</i> (114.188)           | Green asparagus juice (1)    | SPME-GC-MS<br>[21]                           |
| benzaldehyde,<br><i>C7H6O</i> (106.12)         | Green asparagus juice (0.9)  | SPME-GC-MS<br>[21]                           |
|                                                | Cooked white spears          | SPE-GC-MS [17]<br>and SDE-GC-MS<br>[7]       |
| 2,4-octadienal,<br><i>C8H12O</i> (124.18)      | Green asparagus juice (1.6)  | SPME-GC-MS<br>[21]                           |
| 2-octenal,<br><i>C8H14O</i> (126.2)            | Green asparagus juice (17.5) |                                              |
|                                                | Cooked white spears          | SPE-GC-MS [17]<br>and SDE-GC-MS<br>[19,20]   |
| octanal,<br><i>C8H16O</i> (128.212)            | Green asparagus juice (1.7)  | SPME-GC-MS<br>[21]                           |
| phenylacetaldehyde,<br><i>C8H8O</i> (120.15)   | Cooked white spears          | SDE-GC-MS<br>[18–20]                         |
| 2,4-nonadienal,<br><i>C9H14O</i> (138.21)      |                              |                                              |
| 2-nonenal,<br><i>C9H16O</i> (140.226)          | Cooked white spears (10)     | SPE-GC-MS [17]                               |
| nonanal,<br><i>C9H18O</i> (142.239)            | Green asparagus juice (3.4)  | SPME-GC-MS<br>[21]                           |
| 2-phenyl-2-butenal,<br><i>C10H10O</i> (149.19) | Cooked white spears (10)     | SPE-GC-MS [17]                               |
| 2,4-decadienal,<br><i>C10H16O</i> (152.23)     | Green asparagus juice (1.1)  | SPME-GC-MS<br>[21]                           |
|                                                | Cooked white spears          | SPE-GC-MS [17]<br>and SDE-GC-MS<br>[7,19,20] |

---

|                                                                                    |                              |                              |
|------------------------------------------------------------------------------------|------------------------------|------------------------------|
| 2-dodecenal,<br><i>C<sub>12</sub>H<sub>22</sub>O</i> (182.3)                       | Green asparagus juice (1.1)  | SPME-GC-MS<br>[21]           |
| Ketones                                                                            |                              |                              |
| 2,3-butanedione **,<br><i>C<sub>4</sub>H<sub>6</sub>O<sub>2</sub></i> (86.09)      | Cooked white spears          | SDE-GC-MS<br>[7,18–20]       |
| 3-hydroxy-2-butanone,<br><i>C<sub>4</sub>H<sub>8</sub>O<sub>2</sub></i> (88.11)    | Cooked white spears (6400)   | SPE-GC-MS [17]               |
| 3-hydroxy-2-pentanone,<br><i>C<sub>5</sub>H<sub>12</sub>O<sub>2</sub></i> (102.13) | Cooked white spears (80)     |                              |
| 2,3-pentanedione **,<br><i>C<sub>5</sub>H<sub>8</sub>O<sub>2</sub></i> (100.12)    | Cooked white spears          | SDE-GC-MS &<br>GCO [7,18–20] |
| 2-hexanone,<br><i>C<sub>6</sub>H<sub>12</sub>O</i> (100.161)                       | Cooked white spears (10)     | SPE-GC-MS [17]               |
| 2,5-cyclohexadienone,<br><i>C<sub>6</sub>H<sub>6</sub>O</i> (94.11)                | Cooked white spears (90)     |                              |
| 2-heptanone,<br><i>C<sub>7</sub>H<sub>14</sub>O</i> (114.18)                       | Cooked white spears (15)     |                              |
| 3,5-octadien-2-one,<br><i>C<sub>8</sub>H<sub>12</sub>O</i> (124.18)                | Green asparagus juice (3.9)  | SPME-GC-MS<br>[21]           |
| 3,5-octadien-2-one,<br><i>C<sub>8</sub>H<sub>12</sub>O</i> (124.18)                | Cooked white spears (70)     | SPE-GC-MS [17]               |
| 1-octen-3-one,<br><i>C<sub>8</sub>H<sub>14</sub>O</i> (126.2)                      | Green asparagus juice (22.5) | SPME-GC-MS<br>[21]           |
| 6-methyl-5-hepten-2-one,<br><i>C<sub>8</sub>H<sub>14</sub>O</i> (126.2)            | Green asparagus juice (1.5)  |                              |
| 3-octen-2-one,<br><i>C<sub>8</sub>H<sub>14</sub>O</i> (126.2)                      | Green asparagus juice (0.7)  |                              |
| 3-octen-2-one,<br><i>C<sub>8</sub>H<sub>14</sub>O</i> (126.2)                      | Cooked white spears (10)     | SPE-GC-MS [17]               |
| 2,3-octanedione **,<br><i>C<sub>8</sub>H<sub>14</sub>O<sub>2</sub></i> (142.2)     | Cooked white spears          | SDE-GC-MS &<br>GCO [18–20]   |
| 3-octanone,<br><i>C<sub>8</sub>H<sub>16</sub>O</i> (128.21)                        | Green asparagus juice (2.3)  | SPME-GC-MS<br>[21]           |
| 3,5-nonadien-2-one,<br><i>C<sub>9</sub>H<sub>14</sub>O</i> (138.207)               | Cooked white spears (10)     | SPE-GC-MS [17]               |
| 3,5-decadien-2-one,<br><i>C<sub>10</sub>H<sub>16</sub>O</i> (152.23)               | Cooked white spears (10)     |                              |
| β-ionone,<br><i>C<sub>13</sub>H<sub>20</sub>O</i> (192.3)                          | Green asparagus juice (1.4)  | SPME-GC-MS<br>[21]           |



|                                                                |                             |                              |
|----------------------------------------------------------------|-----------------------------|------------------------------|
| geranyl acetone,<br><i>C13H22O</i> (194.31)                    | Green asparagus juice (0.3) |                              |
| Esters                                                         |                             |                              |
| ethyl dodecanoate,<br><i>C14H28O2</i> (228.37)                 | Green asparagus juice (0.7) | SPME-GC-MS<br>[21]           |
| diisobutyl phthalate,<br><i>C16H22O4</i> (278.34)              | Green asparagus juice (1.9) |                              |
| ethyl hexadecanoate,<br><i>C18H36O2</i> (284.5)                | Green asparagus juice (0.6) |                              |
| Carboxylic acids                                               |                             |                              |
| 3-methylbutanoic acid,<br><i>C5H10O2</i> (102.13)              | Green asparagus juice (1)   | SPME-GC-MS<br>[21]           |
| pentanoic acid,<br><i>C5H10O2</i> (102.13)                     | Green asparagus juice (0.6) |                              |
| hexanoic acid,<br><i>C6H12O2</i> (116.158)                     | Green asparagus juice (2.1) |                              |
| Pyrazines                                                      |                             |                              |
| 2-methylpyrazine,<br><i>C5H6N2</i> (94.11)                     | Cooked white spears         | SDE-GC-MS<br>[7,19,20]       |
| 2-ethylpyrazine,<br><i>C6H8N2</i> (108.14)                     | White spears                | SPE-GC-MS [17]               |
| 2,5-dimethylpyrazine,<br><i>C6H8N2</i> (108.14)                | White spears (35)           |                              |
|                                                                | Cooked white spears         | SDE-GC-MS<br>[19,20]         |
| 2,6-dimethylpyrazine **,<br><i>C6H8N2</i> (108.14)             | White spears (200)          | SPE-GC-MS [17]               |
|                                                                | Cooked white spears         | SDE-GC-MS &<br>GCO [7,19,20] |
| 2,3-dimethylpyrazine,<br><i>C6H8N2</i> (108.14)                | White spears                | SPE-GC-MS [17]               |
| 2-ethyl-6-methylpyrazine,<br><i>C7H10N2</i> (122.17)           |                             |                              |
| 2-ethyl-5-methylpyrazine,<br><i>C7H10N2</i> (122.17)           |                             |                              |
| 2-ethyl-3,5-dimethyl pyrazine<br>**, <i>C8H12N2</i> (136.19)   | Cooked white spears         | SDE-GC-MS &<br>GCO [19,20]   |
| 2-methoxy-3-isopropyl pyrazine<br>**, <i>C8H12N2O</i> (152.19) |                             |                              |

|                                                              |                             |                                                   |
|--------------------------------------------------------------|-----------------------------|---------------------------------------------------|
| 2-isobutyl-3-methoxypyrazine<br>**, <i>C9H14N2O</i> (152.19) | Cooked white spears         | SPE-GC-MS [17]<br>& SDE-GC-MS<br>[20]             |
| Furans                                                       |                             |                                                   |
| 2-ethyl-furan,<br><i>C6H8O</i> (96.13)                       | Green asparagus juice (0.2) | SPME-GC-MS<br>[21]                                |
|                                                              | Cooked white spears         | SPE-GC-MS [17]                                    |
|                                                              | Cooked white spears         | SDE-GC-MS<br>[19,20]                              |
| 2-pentyl-furan **,<br><i>C9H14O</i> (138.21)                 | Green asparagus juice (2.3) | SPME-GC-MS<br>[21]                                |
|                                                              | Cooked white spears (165)   | SPE-GC-MS [17]                                    |
|                                                              | Cooked white spears         | SDE-GC-MS<br>[7,19,20]                            |
|                                                              | Asparagus spears            | TDU-GC-MS<br>[22]                                 |
| Sulphur compounds                                            |                             |                                                   |
| dimethyl sulfone,<br><i>C2H6O2S</i> (94.13)                  | Cooked white spears (30)    | SPE-GC-MS [17]                                    |
| dimethyl sulfoxide,<br><i>C2H6OS</i> (78.13)                 | Cooked white spears         | SDE-GC-MS<br>[19,20]                              |
| dimethyl sulfide **,<br><i>C2H6S</i> (62.14)                 | Cooked white spears (3300)  | SPE-GC-MS [17]                                    |
|                                                              | Cooked white spears         | SDE-GC-MS<br>[19,20]                              |
| S-methyl thioacetate,<br><i>C3H6OS</i> (90.15)               | Cooked white spears         | SDE-GC-MS &<br>GCO [19,20]                        |
| 3-methylthiopropanol,<br><i>C4H10OS</i> (106.19)             | Cooked white spears (10)    | SPE-GC-MS [17]                                    |
| methyl propyl sulfide,<br><i>C4H10S</i> (90.19)              | Cooked white spears         | SDE-GC-MS<br>[18,19]                              |
| 3-methylthio-propanal **,<br><i>C4H8OS</i> (104.17)          |                             | SPE-GC-MS &<br>GCO [17]<br>SDE-GC-MS<br>[7,19,20] |
| thiophene-2-carbaldehyde,<br><i>C5H4OS</i> (112.15)          | Cooked white spears (10)    | SPE-GC-MS [17]                                    |
| 2-acetylthiazole,<br><i>C5H5NOS</i> (127.17)                 | Cooked white spears (10)    |                                                   |
|                                                              | Cooked white spears         | SDE-GC-MS<br>[19,20]                              |

|                                                                      |                              |                    |
|----------------------------------------------------------------------|------------------------------|--------------------|
| 2-hydroxymethylthiophene,<br><i>C5H6OS</i> (114.17)                  | Cooked white spears (20)     | SPE-GC-MS [17]     |
| methyl-1,2-dithiolane-4-<br>carboxylate,<br><i>C5H8O2S2</i> (164.28) | Cooked white spears (7000)   |                    |
| ethyl-1,2-dithiolane-4-<br>carboxylate,<br><i>C6H10O2S2</i> (178.27) | Cooked white spears (50)     |                    |
| 2-formyl-3-methylthiophene,<br><i>C6H6OS</i> (126.18)                | Cooked white spears (70)     |                    |
| 3-vinyl-3,4-dihydro-1,2-dithiine,<br><i>C6H8S2</i> (144.26)          | Cooked white spears (20)     |                    |
| Other compounds                                                      |                              |                    |
| methoxy-phenyl-oxime,<br><i>C8H9NO2</i> (151.16)                     | Green asparagus juice (18.9) | SPME-GC-MS<br>[21] |
| 2,4-di-tert-amylphenol,<br><i>C16H26O</i> (234.38)                   | Green asparagus juice (4.3)  |                    |

## Reference

- Wang, M.; Tadmor, Y.; Wu, Q.L.; Chin, C.K.; Garrison, S.A.; Simon, J.E. Quantification of protodioscin and rutin in asparagus shoots by LC/MS and HPLC methods. *J. Agric. Food Chem.* **2003**, *51*, 6132–6136.
- Fanasa, S.; Roupheal, Y.; Venneria, E.; Azzini, E.; Durazzo, A.; Maiani, G. Antioxidant properties of raw and cooked spears of green asparagus cultivars. *Int. J. Food Sci. Tech.* **2009**, *44*, 1017–1023.
- Slatnar, A.; Petkovsek, M.M.; Stampar, F.; Veberic, R.; Horvat, J.; Jakse, M.; Sircelj, H. Game of Tones: sugars, organic acids, and phenolics in green and purple asparagus (*Asparagus officinalis* L.) cultivars. *Turk. J. Agric. For.* **2018**, *42*, 55–66.
- Fuentes-Alventosa, J.; Jaramillo, S.; Rodriguez-Gutierrez, G.; Cermeño, P.; Espejo, J.; Jiménez-Araujo, A.; Guillén-Bejarano, R.; Fernández-Bolaños, J.; Rodríguez-Arcos, R. Flavonoid profile of green asparagus genotypes. *J. Agric. Food Chem.* **2008**, *56*, 6977–6984.
- Lee, E.J.; Yoo, K.S.; Patil, B.S. Development of a rapid HPLC-UV method for simultaneous quantification of protodioscin and rutin in white and green asparagus spears. *J. Food Sci.* **2010**, *75*, 703–709.
- Nakabayashi, R.; Yang, Z.; Nishizawa, T.; Mori, T.; Saito, K. Top-down targeted metabolomics reveals a sulfur-containing metabolite with inhibitory activity against angiotensin-converting enzyme in *Asparagus officinalis*. *J. Nat. Prod.* **2015**, *78*, 1179–1183.
- Hoberg, E.; Ulrich, D.; Standhardt, D.; Kecke, S. Evaluation of *Asparagus officinalis* L. flavour quality for breeding purposes. IX International Asparagus Symposium 479, 1997, pp. 135–142.
- Fan, R.; Yuan, F.; Wang, N.; Gao, Y.; Huang, Y. Extraction and analysis of antioxidant compounds from the residues of *Asparagus officinalis* L. *J. Food Sci. Technol.* **2015**, *52*, 2690–2700.
- Jiménez-Sánchez, C.; Lozano-Sánchez, J.; Rodríguez-Pérez, C.; Segura-Carretero, A.; Fernández-Gutiérrez, A. Comprehensive, untargeted, and qualitative RP-HPLC-ESI-QTOF/MS2 metabolite profiling of green asparagus (*Asparagus officinalis*). *J. Food Compos. Anal.* **2016**, *46*, 78–87.
- Nakabayashi, R.; Hashimoto, K.; Toyooka, K.; Saito, K. Keeping the shape of plant tissue for visualizing metabolite features in segmentation and correlation analysis of imaging mass spectrometry in *Asparagus officinalis*. *Metabolomics* **2019**, *15*, 24.
- Shao, Y.; Chin, C.K.; Ho, C.T.; Ma, W.; Garrison, S.A.; Huang, M.T. Anti-tumor activity of the crude saponins obtained from asparagus. *Cancer Lett.* **1996**, *104*, 31–36.
- Dawid, C.; Hofmann, T. Quantitation and bitter taste contribution of saponins in fresh and cooked white asparagus (*Asparagus officinalis* L.). *Food Chem.* **2014**, *145*, 427–436.

13. Shimoyamada, M.; Suzuki, M.; Maruyama, M.; Watanabe, K. An antifungal saponin from white asparagus (*Asparagus officinalis* L) bottoms. *J. Sci. Food Agric.* **1996**, *72*, 430–434.
14. Sun, Z.; Huang, X.; Kong, L. A new steroidal saponin from the dried stems of *Asparagus officinalis* L. *Fitoterapia* **2010**, *81*, 210–213.
15. Huang, X.; Kong, L. Steroidal saponins from roots of *Asparagus officinalis*. *Steroids* **2006**, *71*, 171–176.
16. Miyoshi, K.; Enomoto, Y.; Fukusaki, E.; Shimma, S. Visualization of Asparaptine in *Asparagus* (*Asparagus officinalis*) using MALDI-IMS. *Anal. Sci.* **2018**, pp. 997-1001
17. Tressl, R.; Bahri, D.; Holzer, M.; Kossa, T. Formation of flavor components in asparagus. 2. Formation of flavor components in cooked asparagus. *J. Agric. Food Chem.* **1977**, *25*, 459–463.
18. Hoberg, E.; Ulrich, D.; Gottwald, J.; Rosen, A. Environmental Influences on the Sensory Quality of *Asparagus officinalis* L. International Conference on Quality in Chains. An Integrated View on Fruit and Vegetable Quality 604, 2003, pp. 395–401.
19. Ulrich, D.; Hoberg, E. Flavor analysis in asparagus breeding. X International Asparagus Symposium 589, 2001, pp. 281–287.
20. Ulrich, D.; Hoberg, E.; Bittner, T.; Engewald, W.; Meilchen, K. Contribution of volatile compounds to the flavor of cooked asparagus. *Eur. Food Res. Technol.* **2001**, *213*, 200–204.
21. Chen, X.; Qin, W.; Ma, L.; Xu, F.; Jin, P.; Zheng, Y. Effect of high pressure processing and thermal treatment on physicochemical parameters, antioxidant activity and volatile compounds of green asparagus juice. *LWT-Food Sci. Technol.* **2015**, *62*, 927–933.
22. Sun, R.; Wang, Y.; Chin, C.K.; Garrison, S. Volatile Compounds in *Asparagus officinalis* L. X International Asparagus Symposium 589, 2001, pp. 257–266.
